# Supplementary material
Source: publisher site journal article supplement (https://www.spandidos-publications.com/2144/downloadSupplementary)
Supplement: Supplementary file 1 [file downloadSupplementary]

## Sheet: Sheet1
Table SI.The qPCR primers of 12 related genes of non-eosinophil polyps, eosinophil polyps and nasal mucosa tissues
Primer name	Sequence（5'→3'）
OR1A1F	ATTATGGTACGGTCATGGGCAC
OR1A1R	TTACGAGGAGATTCTCTTGTTG
AQP10F	CTTCAGTGCTGGTAATGGCTGG
AQP10R	AGCATCTGAGCTGAGGCAGGAG
ABCC8F	GAAGACCAGCATCTTCATCATG
ABCC8R	TTCCGGCTGAGCAGCTTCTCTG
PPARGF	TCAAGACAACCTGCTACAAGCC
PPARGR	CAAGTCCTTGTAGATCTCCTGC
PPARDF	GACACCATCCTGCGTGCCCTCG
PPARDR	GTACATGTCCTTGTAGATCTCC
MAPK9F	TTCCAAGGCACTGACCATATTG
MAPK9R	TTGTCTCGCTCAGATTCTGATG
OR10A3F	TTTCCACCTGTGCCTCTCACCT
OR10A3R	CAAAGTCCTCTTCATCTCACTG
AKT2F	CCTCAGCATCAACTGGCAGGAC
AKT2R	TCGCGGATGCTGGCCGAGTAGG
GAPDHF	GTGAAGGTCGGAGTCAACGG
GAPDHR	CTCCTGGAAGATGGTGATGGG
TNFAF	GGCAGTCAGATCATCTTCTCGA
TNFAR	TGGTTATCTCTCAGCTCCACGC
IL-10F	CTGCCTAACATGCTTCGAGA
IL-10R	TGGATCATCTCAGACAAGGC
CCL-26F	ACACGTGGGAGTGACATATC
CCL-26R	TTCCTTGGATGGGTACAGAC
IL-1BF	CAAGGCACAACAGGCTGCT
IL-1BR	TCCTGGAAGGAGCACTTCATC
